1            ***Streptococcus pneumoniae*, *S. pyogenes*, and *S. agalactiae* membrane**  
2            **phospholipid remodeling in response to human serum**

3  
4

5            Luke. R. Joyce<sup>1</sup>, Ziqiang Guan<sup>2#</sup>, and Kelli L. Palmer<sup>1#</sup>

6

7            <sup>1</sup>Department of Biological Sciences, The University of Texas at Dallas, Richardson, TX,  
8            USA

9            <sup>2</sup>Department of Biochemistry, Duke University Medical Center, Durham, NC, USA

10

11

12            **Running title: Phospholipid remodeling in pathogenic streptococci**

13

14            #Corresponding authors

15            Ziqiang Guan: Ziqiang.Guan@duke.edu

16            Kelli Palmer: Kelli.Palmer@utdallas.edu

17

18            **Keywords:** Streptococcus, lipidomics, phospholipids, phosphatidylcholine,  
19            plasmalogen, cellular membrane

20

21

22 **Abstract**

23 *Streptococcus pneumoniae*, *S. pyogenes* (Group A *Streptococcus*; GAS), and *S.*  
24 *agalactiae* (Group B *Streptococcus*; GBS) are major etiological agents of diseases in  
25 humans. The cellular membrane, a crucial site in host-pathogen interactions, is poorly  
26 characterized in streptococci. Moreover, little is known about whether or how  
27 environmental conditions influence their lipid compositions. Using normal phase liquid  
28 chromatography coupled with electrospray ionization mass spectrometry, we  
29 characterized the phospholipids and glycolipids of *S. pneumoniae*, GAS, and GBS in  
30 routine undefined laboratory medium, streptococcal defined medium, and, in order to  
31 mimic the host environment, defined medium supplemented with human serum. In human  
32 serum-supplemented medium, all three streptococcal species synthesize  
33 phosphatidylcholine (PC), a zwitterionic phospholipid commonly found in eukaryotes but  
34 relatively rare in bacteria. We previously reported that *S. pneumoniae* utilizes the  
35 glycerophosphocholine (GPC) biosynthetic pathway to synthesize PC. Through substrate  
36 tracing experiments, we confirm that GAS and GBS scavenge lysoPC, a major metabolite  
37 in human serum, thereby using an abbreviated GPC pathway for PC biosynthesis.  
38 Furthermore, we found that plasmanyloleoyl-PC is uniquely present in the GBS membrane  
39 during growth with human serum, suggesting GBS possesses unusual membrane  
40 biochemical or biophysical properties. In summary, we report cellular lipid remodeling by  
41 the major pathogenic streptococci in response to metabolites present in human serum.

42

## 43 Introduction

44 Streptococci are Gram-positive bacteria that natively colonize humans in niches including  
45 the oral cavity, the nasopharynx, and the genitourinary tract (1). Three species of  
46 streptococci, *Streptococcus pneumoniae*, *S. pyogenes* (Group A *Streptococcus*; GAS),  
47 and *S. agalactiae* (Group B *Streptococcus*; GBS), are considered major human  
48 pathogens, resulting in over 1.5 million deaths each year around the world (2,3). These  
49 pathogens cause a wide range of diseases of varying severity in all age groups, including  
50 streptococcal pharyngitis, soft tissue infections, pneumonia, meningitis, bacteremia, and  
51 necrotizing fasciitis (3–10).

52

53 The surface of the streptococcal cell is a critical interface for host interactions. Many  
54 studies into the pathogenicity of streptococci have focused on virulence factors including  
55 secreted proteins, surface polymers and adhesins, and mechanisms for sensing the  
56 extracellular environment (11–13). In contrast, little is known about the cellular membrane  
57 composition and dynamics of streptococci. Earlier studies mainly utilized thin layer  
58 chromatography (TLC) or column separation coupled with paper chromatography to study  
59 membrane lipids extracted from cultures in routine laboratory medium (14–19). However,  
60 these methods lack molecular specificity and sensitivity for the comprehensive  
61 characterization of membrane lipids (20). The phospholipids phosphatidylglycerol (PG)  
62 and cardiolipin (CL), and the glycolipids monohexosyldiacylglycerol (MHDAG) and  
63 dihexosyldiacylglycerol (DHDAG) were previously detected in all three streptococcal  
64 species (14–19,21–23).

65

66 We recently utilized normal phase liquid chromatography coupled with electrospray  
67 ionization mass spectrometry (NPLC-ESI/MS) to characterize the lipid membranes of the  
68 Mitis group streptococcal species *S. pneumoniae*, *S. mitis*, and *S. oralis*, and described  
69 for the first time the presence of the zwitterionic phospholipid phosphatidylcholine (PC) in  
70 these organisms (24,25). We further showed that the biosynthesis of PC in these  
71 organisms occurs through the rare glycerophosphocholine (GPC) pathway which relies  
72 upon scavenging of GPC and/or lysophosphatidylcholine (lysoPC) from the growth  
73 medium (24).

74

75 Here, we utilized NPLC-ESI/MS to characterize the membrane lipids of the three major  
76 streptococcal pathogens. To mimic the human host environment and to assess the effects  
77 of human serum on the membrane lipid compositions, the streptococci were cultured in  
78 defined medium with or without human serum supplementation. We show that: 1) human  
79 serum provides the substrates required for *S. pneumoniae* to synthesize PC; 2) the GAS  
80 and GBS scavenge the human metabolite lysoPC to synthesize PC via an abbreviated  
81 GPC pathway; and, 3) plasmany-PC (pPC) is uniquely present in the GBS membrane  
82 during culture with human serum.

83

## 84 **Material and Methods**

### 85 **Bacterial strains, media, and growth conditions**

86 Culture media and bacterial strains used in this study are shown in Table 1 and Table S1,  
87 respectively. Routine laboratory culture conditions for each species were 37°C for GBS,  
88 and 37°C and 5% CO<sub>2</sub> for *S. pneumoniae* and GAS. Rich culture media used were Todd-

89 Hewitt Broth for GBS and Todd-Hewitt Broth supplemented with yeast extract at 0.5% w/v  
90 for *S. pneumoniae* and 0.2% w/v for GAS. Streptococcal chemically defined medium (26)  
91 was diluted from stock as described (27) with 1% glucose, for GAS and GBS. For *S.*  
92 *pneumoniae*, defined medium was supplemented with 0.5 mM choline (25). Where  
93 appropriate, defined medium was supplemented with 5% v/v human serum (Sigma-  
94 Aldrich), 100  $\mu$ M GPC (Sigma-Aldrich), or 100  $\mu$ M lysoPC 20:0 (Avanti Polar Lipids). See  
95 Supplemental Text S1 for growth curve methodology.

96

### 97 **GAS and GBS culture for lipidomic analysis**

98 Single colonies of GAS and GBS were inoculated into 15 mL rich medium and incubated  
99 overnight as described above, until pelleting and storage for lipidomic analysis described  
100 below. For defined medium analysis, single colonies were cultured in defined medium  
101 overnight, diluted into 15 mL pre-warmed defined medium supplemented with or without  
102 5% v/v human serum to an OD<sub>600nm</sub> of 0.05, and incubated for 8 h before pelleting.  
103 Cultures were performed in biological triplicate.

104

### 105 ***S. pneumoniae* culture for lipidomic analysis**

106 Single colonies of *S. pneumoniae* were inoculated into 6 mL rich medium, serially diluted,  
107 and incubated overnight as described. Cultures in early exponential phase were  
108 inoculated into 15 mL pre-warmed rich medium and cultured until early stationary phase.  
109 Overnight defined medium cultures were inoculated directly from freezer stocks and  
110 serially diluted for overnight growth. Early exponential phase cultures were inoculated into

111 defined medium supplemented with or without 5% v/v human serum at an OD<sub>600nm</sub> of 0.05  
112 and incubated for 8 h until pelleting. Cultures were performed in biological triplicate.

113

#### 114 **GPC and lysoPC supplementation experiments**

115 Overnight defined medium cultures of GAS and GBS were diluted to a starting OD<sub>600nm</sub>  
116 0.05 in 15 mL defined medium supplemented with either 100 µM GPC or 100 µM lysoPC  
117 (20:0) and incubated for 8 h as described above. Cultures were pelleted and stored for  
118 lipidomic analysis. Cultures were performed in biological triplicate.

119

#### 120 **Lipidomics**

121 Acidic Bligh-Dyer lipid extractions were performed as described (25,28). Normal-phase  
122 LC-ESI/MS was performed on an Agilent 1200 quaternary LC system equipped with an  
123 Ascentis silica high-performance liquid chromatography (HPLC) column (5 µm; 25 cm by  
124 2.1 mm; Sigma-Aldrich) as described previously (25,28,29). See Supplemental Text S1  
125 for more information.

126

#### 127 **Results**

#### 128 **Pathogenic streptococci remodel their membrane phospholipid composition in** 129 **response to human serum**

130 The major phospholipids detected by normal-phase LC-ESI/MS for each streptococcal  
131 species and strain used in this study, when cultured in the rich, undefined laboratory  
132 medium Todd-Hewitt Broth (supplemented with yeast extract where appropriate), and in  
133 streptococcal defined medium supplemented with or without 5% v/v human serum, are

134 shown in Table 1. The biosynthetic pathways for these lipids are shown in Figure 1.  
135 Growth curves for streptococci cultured with or without 5% v/v human serum are shown  
136 in Supplemental Figure S1A-F. Human serum supplementation did not significantly alter  
137 the growth of the bacteria, except during late exponential and early stationary phase of  
138 *S. pneumoniae* D39 (Supplemental Figure S1A).

139

140 The lipid profile of *S. pneumoniae* cultured in Todd-Hewitt Broth supplemented with 0.5%  
141 w/v yeast extract consists of the major anionic phospholipids PG and CL, the zwitterionic  
142 phospholipid PC, and the glycolipids MHDAG and DHDAG (25). Figure 2A (panel 1)  
143 displays the positive ESI mass spectrum of PC (appearing at the retention time 19-20.5  
144 min) in the membrane of *S. pneumoniae*. We previously determined that Todd-Hewitt  
145 Broth contains GPC, a substrate utilized by *S. pneumoniae* to synthesize PC (25). A  
146 similar phospholipid profile is observed for *S. pneumoniae* cultured in defined medium,  
147 except that PC is absent, due to the lack of GPC and lysoPC substrates in the medium  
148 (25). The total ion chromatogram (TIC) (Supplemental Figure S2) and mass spectrum  
149 (MS) of retention time 19-20.5 min of *S. pneumoniae* D39 grown in defined medium  
150 lacking human serum are shown in Figure 2A (panel 2), and no PC is present. However,  
151 *S. pneumoniae* synthesizes PC when defined medium is supplemented with 5% v/v  
152 human serum (Supplemental Figure S2). Figure 2A (panel 3) shows the ESI mass  
153 spectrum of the major PC species. These data demonstrate that human serum provides  
154 the substrates required for PC biosynthesis via the GPC pathway in *S. pneumoniae*.

155

156 The lipid profile of GAS cultured in Todd-Hewitt Broth supplemented with 0.2% w/v yeast  
157 extract is similar to that of *S. pneumoniae*, with the exception that PC is not detected  
158 (Table 3.1, Figure 2B [panel 1]). The lipid profile remains unchanged in defined medium,  
159 and no PC is detected (Figure 2B [panel 2] and Supplemental Figure S2). Interestingly,  
160 PC is observed in the membrane of GAS when defined medium is supplemented with 5%  
161 v/v human serum, indicating that human serum, but not Todd-Hewitt Broth or defined  
162 medium, provide substrates required for PC biosynthesis (Supplemental Figure S2). The  
163 ESI/MS of the major PC species identified in the GAS membrane is shown in  
164 Supplemental Figure S3. The chemical structure of PC (16:0/18:2) (with the M<sup>+</sup> ion at  
165 *m/z* 758) is shown in Supplemental Figure S3A and the supporting tandem mass  
166 spectrometry (MS/MS) fragmentation of *m/z* 758 is shown in Supplemental Figure S3B.

167

168 The lipid profile of GBS cultured in Todd-Hewitt Broth consists of MHDAG, DHDAG, PG,  
169 and CL, as well as the aminoacylated PG molecule lysyl-PG (Lys-PG), and a recently  
170 described novel, cationic glycolipid, Lysyl-Glucosyl-DAG (LGD) (Table 1, Supplemental  
171 Figure S2) (23). The lipidomic profile of the GBS is unchanged when cultured in defined  
172 medium (Table 1). Like GAS, the GBS do not synthesize PC when cultured in Todd-Hewitt  
173 Broth or defined medium (Figure 2C [panel 1 and panel 2]). Also, like GAS, GBS  
174 synthesize PC when defined medium is supplemented with 5% v/v human serum (Figure  
175 2C [panel 3], Supplemental Figure S2). However, the ESI mass spectrum (Figure 2C  
176 [panel 3]) indicates a modified PC molecule that co-elutes off the column at the same time  
177 as Lys-PG. The modified PC molecule was determined to be the plasmalogen, plasmanyl-  
178 PC (pPC) (Supplemental Figure S3), in which the *sn*-1 acyl chain linkage is an ether bond,



179 instead of the ester bond that is present in diacyl PC (Supplemental Figure S3A and S3C).  
180 The identification of pPC is supported by MS/MS. Specifically, the  $m/z$  482 ion in the  
181 MS/MS spectrum of  $m/z$  720 (Supplemental Figure S3D) is consistent with the pPC  
182 structure, as compared to the  $m/z$  496 ion in the MS/MS spectrum of  $m/z$  758 for the  
183 diacyl PC (Supplemental Figure S3B).

184

185 Taken together, these data demonstrate that major pathogenic streptococci remodel their  
186 membrane lipid composition by synthesizing PC in response to metabolites present in  
187 human serum. Furthermore, plasmanyl-PC is uniquely observed in the membrane of the  
188 GBS during culture with human serum.

189

#### 190 **GAS and GBS scavenge lysoPC to form PC**

191 Next, we sought to investigate if GAS and GBS utilize the GPC biosynthetic pathway  
192 previously identified in the Mitis group streptococci (25). GAS and GBS strains were  
193 cultured in defined medium supplemented with either 100  $\mu$ M GPC or 100  $\mu$ M lysoPC  
194 (20:0), a non-natural acyl chain length in these species, and lipidomic analysis was  
195 performed. These concentrations are physiologically relevant because lysoPC and GPC  
196 are present in varying concentrations throughout the human body at  $\leq 200$   $\mu$ M and  $\leq 500$   
197  $\mu$ M, respectively (30,31). The ESI mass spectra are shown in Figure 3. When GAS is  
198 cultured in GPC-supplemented defined medium, very little PC is detected (Figure 3A). In  
199 defined medium supplemented with lysoPC (20:0), a substantial amount of PC is detected  
200 for GAS (Figure 3B). Similarly, when GBS is cultured in GPC-supplemented defined  
201 medium, no PC is detected (Figure 3C), and robust levels of PC are observed when GBS

202 are cultured in defined medium supplemented with lysoPC (20:0) (Figure 3D). Taken  
203 together, these data identify lysoPC, not GPC, as the primary substrate scavenged by the  
204 GAS and GBS to synthesize PC.

205

## 206 **Discussion**

207 The cellular membrane is a critical and dynamic surface of bacterial cells that plays a role  
208 in many cellular processes yet is largely understudied in streptococci. In this study we  
209 characterized the lipidome of the major streptococcal pathogens *S. pneumoniae*, GAS,  
210 and GBS when cultured in a standard rich laboratory medium (Todd-Hewitt Broth), and a  
211 defined medium supplemented with or without 5% v/v human serum. We show that all  
212 three streptococcal species remodel their cellular membrane in response to human  
213 metabolites, specifically, by synthesis of PC. To our knowledge, this is the first  
214 identification of PC and the plasmalogen pPC in the GAS and GBS, respectively. PC has  
215 been linked to virulence in certain bacteria (32,33). Streptococci may incorporate PC into  
216 their membranes as a form of eukaryotic membrane mimicry to evade immune defense,  
217 although this must be investigated further.

218

219 Human serum is a rich source of nutrients for streptococci. A major metabolite of human  
220 serum is lysoPC (30,34). *S. pneumoniae* utilizes a full GPC pathway (25), scavenging  
221 metabolites from human serum to synthesize PC. However, the GAS and GBS  
222 predominantly synthesize PC using an abbreviated GPC pathway, by primarily  
223 scavenging lysoPC from the exogenous environment. This is likely due to a missing or  
224 poorly expressed GPC transporter and/or the inability to acylate GPC to form lysoPC. The

225 ability of *S. pneumoniae* but not GAS or GBS to scavenge GPC could be capitalized upon  
226 in comparative genomic and laboratory experiments to help identify the GPC transporter  
227 in *S. pneumoniae*, which is currently unknown.

228

229 To our knowledge, the presence of the plasmalogen pPC in the GBS membrane has not  
230 been described before. To date, plasmalogens have only been observed in strict  
231 anaerobes such as *Clostridium* and *Bifidobacterium* (35–37). Biosynthesis of  
232 plasmalogens in bacteria is poorly understood, with the first bacterial desaturase involved  
233 in plasmenyl *sn*-1 vinyl ether bond formation and the first plasmalogen synthase, PlsAR,  
234 in *Clostridium perfringens* only recently identified (38,39). Plasmalogen lipids are thought  
235 to promote oxidative stress survival in animal cells (40,41) and may play a role in GBS  
236 pathogenesis. pPC has been detected in human blood at ~50  $\mu$ M in healthy adults  
237 (30,34). There are two possible pathways for the presence of pPC in the membrane of  
238 GBS during culturing with human serum. Either, 1) GBS scavenge the intermediate lyso-  
239 pPC, adding the second acyl chain, and/or full pPC directly from human serum or 2) *de*  
240 *novo* pPC synthesis is occurring. Our experimental design does not allow us to  
241 discriminate which pathway is utilized. Given that GBS lack an identifiable homolog of the  
242 *C. perfringens* PlsAR synthase, coupled with the lack of plasmalogen form of other  
243 common lipids, the pPC we identify in the membrane of GBS is likely derived from the  
244 plasmalogen lipids present in human serum. The origin and roles of pPC in GBS is a  
245 subject of further investigation.

246

247 Overall, this work demonstrates that culture medium can significantly alter the membrane  
248 lipid composition of major human streptococcal pathogens. This supports the significance  
249 of culturing pathogens in media that more closely represent the host environments in  
250 which the pathogens are found. Further investigation into the biosynthesis and  
251 mechanistic roles of PC in the membrane will likely provide novel insights into the  
252 pathogen-host interactions and pathogenesis of these streptococcal species.

253

#### 254 **Conflicts of interest**

255 The author(s) declare that there are no conflicts of interest.

256

#### 257 **Funding information**

258 The work was supported by grant R21AI130666 from the National Institutes of Health and  
259 the Cecil H. and Ida Green Chair in Systems Biology Science to K.P, grant R56AI139105  
260 from the National Institutes of Health to K.P and Z.G., and grant U54GM069338 from the  
261 National Institutes of Health to Z.G.

262

#### 263 **Acknowledgements**

264 We gratefully acknowledge Michael Federle at the University of Illinois at Chicago for  
265 providing *S. pneumoniae* D39.

266

#### 267 **References**

- 268 1. Facklam R. What happened to the streptococci: Overview of taxonomic and  
269 nomenclature changes. *Clin Microbiol Rev.* 2002;15(4):613–30. doi:

- 270 10.1128/CMR.15.4.613-630.2002
- 271 2. Carapetis JR, Steer AC, Mulholland EK, Weber M. The global burden of Group A  
272 Streptococcal diseases. *Lancet Infect Dis*. 2005;5(11):685–94. doi:  
273 10.1016/S1473-3099(05)70267-X
- 274 3. CDC. Antibiotic resistance threats in the United States, 2019. [Internet]. Atlanta,  
275 GA: US Department of Health and Human Services, CDC. doi:  
276 10.15620/cdc:82532
- 277 4. Weiser JN, Ferreira DM, Paton JC. *Streptococcus pneumoniae*: transmission,  
278 colonization and invasion. *Nat Rev Microbiol*. 2018;16(6):355–67. doi:  
279 10.1038/s41579-018-0001-8
- 280 5. Kaplan EL, Top FH, Dudding BA, Wannamaker LW. Diagnosis of Streptococcal  
281 Pharyngitis: Differentiation of Active Infection from the Carrier State in the  
282 Symptomatic Child. *J Infect Dis* •. 1971;123(5):490–501. doi:  
283 10.1093/infdis/123.5.490
- 284 6. Cunningham MW. Pathogenesis of Group A Streptococcal Infections. *Clin*  
285 *Microbiol Rev*. 2000;13(3):470–511. doi: 10.1128/cmr.13.3.470-511.2000
- 286 7. Schuchat A. Group B Streptococcus. *Lancet*. 1999;353:51–6. doi:  
287 10.1016/S0140-6736(98)07128-1
- 288 8. Campbell JR, Hillier SL, Krohn MA, Ferrieri P, Zaleznik DF, Baker CJ. Group B  
289 Streptococcal colonization and serotype-specific immunity in pregnant women at  
290 delivery. *Obstet Gynecol*. 2000;96(4):498–503. doi: 10.1016/s0029-  
291 7844(00)00977-7
- 292 9. Nandyal RR. Update on Group B Streptococcal infections: perinatal and neonatal

- 293 periods. *J Perinat Neonatal Nurs.* 2008;22(3):230–7. doi:  
294 10.1097/01.JPN.0000333925.30328.fd
- 295 10. Edwards MS, Rench MA, Haffar AA, Murphy MA, Desmond MM, Baker CJ. Long-  
296 term sequelae of Group B Streptococcal meningitis in infants. *J Pediatr.*  
297 1985;106(5):717–22. doi: 0.1016/s0022-3476(85)80342-5
- 298 11. Armistead B, Oler E, Adams Waldorf K, Rajagopal L. The Double Life of Group B  
299 *Streptococcus*: Asymptomatic Colonizer and Potent Pathogen. *J Mol Biol.*  
300 2019;431(16):2914–31. doi: 10.1016/j.jmb.2019.01.035
- 301 12. Wilkening R V, Federle MJ. Evolutionary Constraints Shaping *Streptococcus*  
302 *pyogenes*-Host Interactions. *Trends Microbiol.* 2017;25(7):562–72. doi:  
303 10.1016/j.tim.2017.01.007
- 304 13. Mitchell AM, Mitchell TJ. *Streptococcus pneumoniae*: Virulence factors and  
305 variation. *Clin Microbiol Infect.* 2010;16(5):411–8. doi: 10.1111/j.1469-  
306 0691.2010.03183.x
- 307 14. Cohen M, Panos C. Membrane Lipid Composition of *Streptococcus pyogenes* and  
308 Derived L Form. *Biochemistry.* 1966;5(7):2385–92. doi: 10.1021/bi00871a031
- 309 15. Meiers M, Volz C, Eisel J, Maurer P, Henrich B, Hakenbeck R. Altered lipid  
310 composition in *Streptococcus pneumoniae* cpoA mutants. *BMC Microbiol.*  
311 2014;14(1):1–12. doi: 10.1186/1471-2180-14-12
- 312 16. Trombe M-C, Lanéelle M-A, Lanéelle G. Lipid composition of aminopterin-  
313 resistant and sensitive strains of *Streptococcus pneumoniae*. *Biochim Biophys*  
314 *Acta - Lipids Lipid Metab.* 1979;574:290–300. doi: 10.1016/0005-2760(79)90010-  
315 9

- 316 17. Brundish DE, Shaw N, Baddiley J. The phospholipids of *Pneumococcus* I-192R,  
317 A.T.C.C. 12213. *Biochem J.* 1967;104:205–11. doi: 10.1042/bj1040205
- 318 18. Fischer W. The polar lipids of Group B Streptococci. II. Composition and  
319 positional distribution of fatty acids. *Biochim Biophys Acta.* 1977;487(1):89–104.  
320 doi: 10.1016/0005-2760(77)90046-7
- 321 19. Curtis J, Kim G, Wehr NB, Levine RL. Group B Streptococcal phospholipid  
322 causes pulmonary hypertension. *Proc Natl Acad Sci U S A.* 2003;100(9):5087–90.  
323 doi: 10.1073/pnas.0931493100
- 324 20. Goldfine H, Guan Z. Lipidomic Analysis of Bacteria by Thin-Layer  
325 Chromatography and Liquid Chromatography/Mass Spectrometry. In:  
326 Hydrocarbon and Lipid Microbiology Protocols. p. 125–39. doi:  
327 10.1007/8623\_2015\_56
- 328 21. Doran KS, Engelson EJ, Khosravi A, Maisey HC, Fedtke I, Equils O, et al. Blood-  
329 brain barrier invasion by Group B *Streptococcus* depends upon proper cell-  
330 surface anchoring of lipoteichoic acid. *J Clin Invest.* 2005;115(9):2499–507. doi:  
331 10.1172/JCI23829
- 332 22. Schneewind O, Missiakas D. Lipoteichoic acids, phosphate-containing polymers  
333 in the envelope of gram-positive bacteria. *J Bacteriol.* 2014;196(6):1133–42. doi:  
334 10.1128/JB.01155-13
- 335 23. Joyce LR, Manzer HS, Da Mendonça JC, Villarreal R, Doran KS, Palmer KL, et al.  
336 *Streptococcus agalactiae* MprF synthesizes a novel cationic glycolipid that  
337 promotes brain entry and meningitis. *bioRxiv.* 2020; doi:  
338 <https://doi.org/10.1101/2020.12.01.406702>

- 339 24. Adams HM, Joyce LR, Guan Z, Akins RL, Palmer KL. *Streptococcus mitis* and *S.*  
340 *oralis* Lack a Requirement for CdsA, the Enzyme Required for Synthesis of Major  
341 Membrane Phospholipids in Bacteria. *Antimicrob Agents Chemother.*  
342 2017;61(5):e02552-16. doi: 10.1128/AAC.02552-16
- 343 25. Joyce LR, Guan Z, Palmer KL. Phosphatidylcholine Biosynthesis in Mitis Group  
344 Streptococci via Host Metabolite Scavenging. *J Bacteriol.* 2019;201(22):e00495-  
345 19. doi: 10.1128/JB.00495-19
- 346 26. Van De Rijn I, Kessler RE. Growth characteristics of Group A Streptococci in a  
347 new chemically defined medium. *Infect Immun.* 1980;27(2):444–8. doi:  
348 10.1128/IAI.27.2.444-448.1980
- 349 27. Chang JC, LaSarre B, Jimenez JC, Aggarwal C, Federle MJ. Two Group A  
350 Streptococcal peptide pheromones act through opposing rgg regulators to control  
351 biofilm development. *PLoS Pathog.* 2011;7(8):e1002190. doi:  
352 10.1371/journal.ppat.1002190
- 353 28. Tan BK, Bogdanov M, Zhao J, Dowhan W, Raetz CRH, Guan Z. Discovery of a  
354 cardiolipin synthase utilizing phosphatidylethanolamine and phosphatidylglycerol  
355 as substrates. *Proc Natl Acad Sci.* 2012;109(41):16504–9. doi:  
356 10.1073/pnas.1212797109
- 357 29. Li C, Tan BK, Zhao J, Guan Z. In vivo and in vitro synthesis of  
358 phosphatidylglycerol by an *Escherichia coli* cardiolipin synthase. *J Biol Chem.*  
359 2016;291(48):25144–53. doi: 10.1074/jbc.M116.762070
- 360 30. Wishart DS, Feunang YD, Marcu A, Guo AC, Liang K, Vázquez-Fresno R, et al.  
361 HMDB 4.0: the human metabolome database for 2018. *Nucleic Acids Res.*



- 362 2018;46(D1):D608–17. doi: 10.1093/nar/gkx1089
- 363 31. Ojala PJ, Hirvonen TE, Hermansson M, Somerharju P, Parkkinen J. Acyl chain-  
364 dependent effect of lysophosphatidylcholine on human neutrophils. *J Leukoc Biol.*  
365 2007;82(6):1501–9. doi: 10.1189/jlb.0507292
- 366 32. Sohlenkamp C, Geiger O. Bacterial membrane lipids: Diversity in structures and  
367 pathways. *FEMS Microbiol Rev.* 2016;40(1):133–59. doi: 10.1093/femsre/fuv008
- 368 33. Geiger O, López-Lara IM, Sohlenkamp C. Phosphatidylcholine biosynthesis and  
369 function in bacteria. *Biochim Biophys Acta - Mol Cell Biol Lipids.* 2013;1831:503–  
370 13. doi: 10.1016/j.bbalip.2012.08.009
- 371 34. Psychogios N, Hau DD, Peng J, Guo AC, Mandal R, Bouatra S, et al. The human  
372 serum metabolome. *PLoS One.* 2011;6(2):e16957. doi:  
373 10.1371/journal.pone.0016957
- 374 35. Goldfine H. The anaerobic biosynthesis of plasmalogens. *FEBS Lett.*  
375 2017;591(18):2714–9. doi: 10.1002/1873-3468.12714
- 376 36. Mawatari S, Sasuga Y, Morisaki T, Okubo M, Emura T, Fujino T. Identification of  
377 plasmalogens in *Bifidobacterium longum*, but not in *Bifidobacterium animalis*. *Sci*  
378 *Rep.* 2020;10(1):1–10. doi: 10.1038/s41598-019-57309-7
- 379 37. Guan Z, Katzianer D, Zhu J, Goldfine H. *Clostridium difficile* contains plasmalogen  
380 species of phospholipids and glycolipids. *Biochim Biophys Acta.*  
381 2014;1842(10):1353–9. doi: 10.1016/j.bbalip.2014.06.011
- 382 38. Gallego-García A, Monera-Girona AJ, Pajares-Martínez E, Bastida-Martínez E,  
383 Pérez-Castaño R, Iniesta AA, et al. A bacterial light response reveals an orphan  
384 desaturase for human plasmalogen synthesis. *Science (80- )*.

- 385           2019;366(6461):128–32. doi: 10.1126/science.aay1436
- 386   39.   Jackson DR, Cassilly CD, Plichta DR, Vlamakis H, Liu H, Melville SB, et al.  
387           Plasmalogen Biosynthesis by Anaerobic Bacteria: Identification of a Two-Gene  
388           Operon Responsible for Plasmalogen Production in *Clostridium perfringens*. *ACS*  
389           *Chem Biol*. 2021;16(1):6–13. doi: 10.1021/acscchembio.0c00673
- 390   40.   Zoeller RA, Morand OH, Raetz CRH. A possible role for plasmalogens in  
391           protecting animal cells against photosensitized killing. *J Biol Chem*.  
392           1988;263(23):11590–6. doi: 10.1016/S0021-9258(18)38000-1
- 393   41.   Broniec A, Żądło A, Pawlak A, Fuchs B, Kłosiński R, Thompson D, et al.  
394           Interaction of plasmenylcholine with free radicals in selected model systems. *Free*  
395           *Radic Biol Med*. 2017;106:368–78. doi: 10.1016/j.freeradbiomed.2017.02.029
- 396

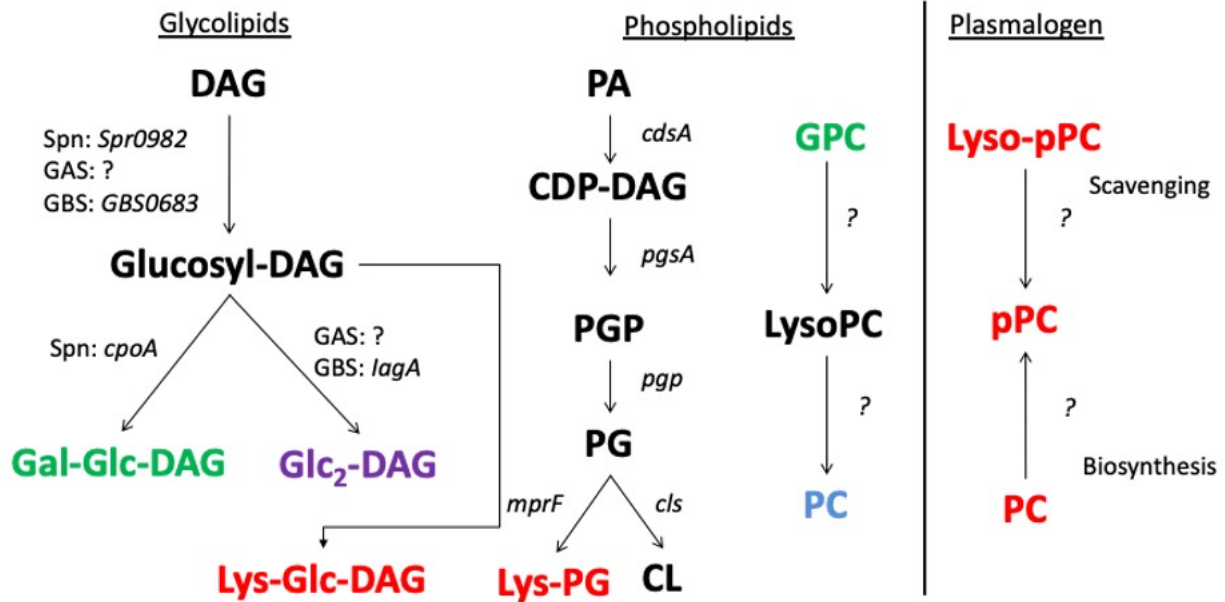

397

398 **Figure 1. Glycolipid and phospholipid biosynthesis pathways in *S. pneumoniae*,**  
 399 **GAS, and GBS.** Genes of known or predicted function in each pathway are indicated.  
 400 Lipids and substrates in black are common to all three species, in green are specific to *S.*  
 401 *pneumoniae* (Spn), in red are specific to GBS, in blue are present in *S. pneumoniae* and  
 402 GAS, and in purple are present in both GAS and GBS. DAG, diacylglycerol; Glc<sub>2</sub>-DAG,  
 403 diglucosyl-DAG; Gal-Glc-DAG, galactosyl-glucosyl-DAG; Lys-Glc-DAG, lysyl-glucosyl-  
 404 DAG (synthesized by *mprF* (23)); PA, phosphatidic acid; CDP-DAG, cytidine  
 405 diphosphate-DAG; PGP, PG-3-phosphate; PG, phosphatidylglycerol; Lys-PG, lysyl-  
 406 phosphatidylglycerol; CL, cardiolipin; GPC, glycerophosphocholine; lysoPC, lyso-  
 407 phosphatidylcholine; PC, phosphatidylcholine; Lyso-pPC, lyso-plasmany-PC; pPC,  
 408 plasmany-PC. “?” denotes unidentified genes. It is currently unknown whether GBS  
 409 scavenge lyso-pPC or pPC from human serum or if it is *de novo* synthesized from PC.  
 410 This figure combines lipids and genes described in literature (14-19,21-25,32,33) and  
 411 detected lipids from Table 1.

412

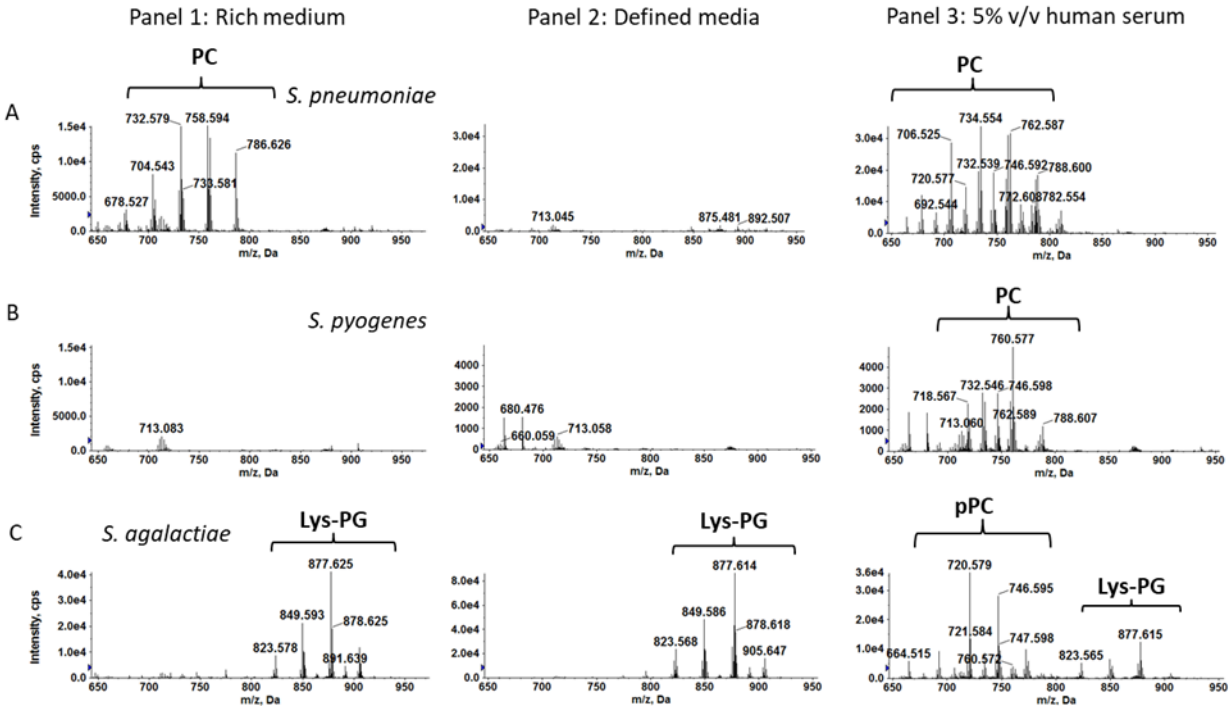

413

414 **Figure 2. PC and Lys-PG detection when streptococci are cultured in different**  
415 **media.** Shown are representative positive ESI mass spectra obtained during the LC  
416 retention time of 19 – 20.5 min indicating the presence or absence of PC, pPC, and Lys-  
417 PG in the membranes of A) *S. pneumoniae* TIGR4, B) *S. pyogenes* (GAS) MGAS315,  
418 and C) *S. agalactiae* (GBS) COH1 when cultured in: Panel 1, rich undefined medium;  
419 Panel 2, defined medium; and Panel 3, defined medium supplemented 5% v/v human  
420 serum. All cultures were performed in biological triplicate and representative spectra are  
421 shown.

422

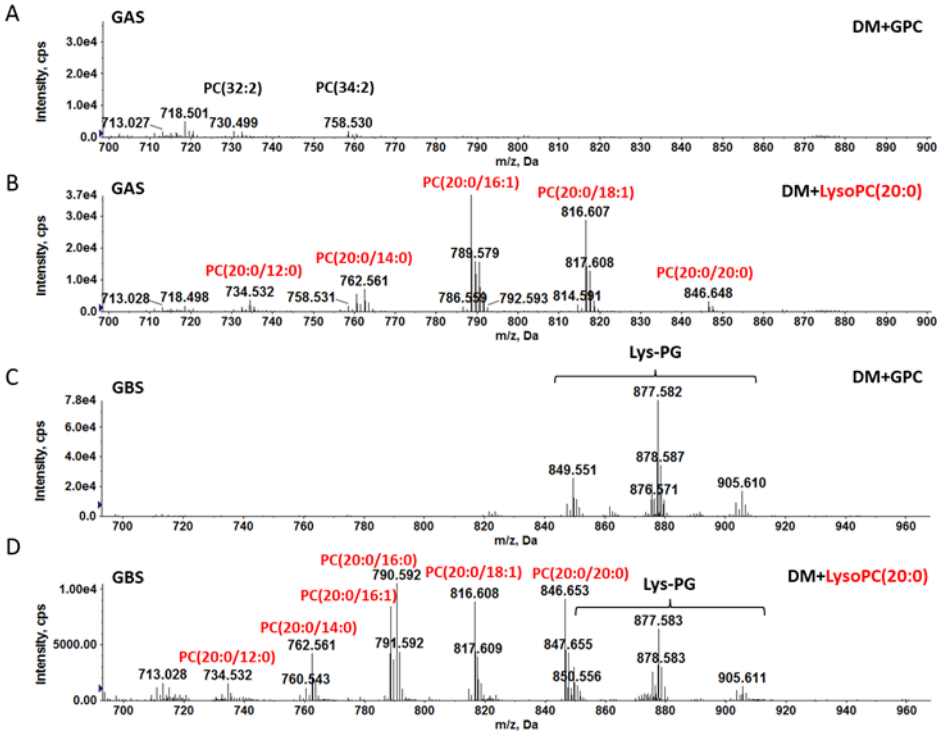

423  
424  
425  
426  
427  
428  
429  
430  
431

**Figure 3. LysoPC is scavenged by GAS and GBS to synthesize PC.** A) GAS strain NZ131 cultured in defined medium supplemented with 100  $\mu$ M GPC synthesizes a very low level of PC. B) GAS strain NZ131 grown in defined medium supplemented with 100  $\mu$ M lysoPC (20:0) synthesizes PC. C) No PC is detected for GBS strain COH1 cultured in defined medium supplemented with 100  $\mu$ M GPC. D) GBS strain COH1 cultured in defined medium supplemented with 100  $\mu$ M lysoPC (20:0) synthesizes PC. Cultures were performed in biological triplicate and representative data are shown.

432 **Table 1. Major lipids detected in *S. pneumoniae*, GAS, and GBS.**

| Species                           | Strain      | Medium <sup>1</sup> | Detection of <sup>2</sup> |       |       |    |    |    |                    |        |     |    |     |   |
|-----------------------------------|-------------|---------------------|---------------------------|-------|-------|----|----|----|--------------------|--------|-----|----|-----|---|
|                                   |             |                     | DAG                       | MHDAG | DHDAG | PA | PG | CL | C <sub>55</sub> -P | Lys-PG | LGD | PC | pPC |   |
| <i>S. pneumoniae</i> <sup>3</sup> | D39         | THB+0.5Y            | +                         | +     | +     | +  | +  | +  | +                  | +      | -   | -  | +   | - |
|                                   |             | DM                  | +                         | +     | +     | +  | +  | +  | +                  | +      | -   | -  | -   | - |
|                                   |             | DM-HS               | +                         | +     | +     | +  | +  | +  | +                  | +      | -   | -  | +   | - |
|                                   | TIGR4       | THB+0.5Y            | +                         | +     | +     | +  | +  | +  | +                  | +      | -   | -  | +   | - |
|                                   |             | DM                  | +                         | +     | +     | +  | +  | +  | +                  | +      | -   | -  | -   | - |
|                                   |             | DM-HS               | +                         | +     | +     | +  | +  | +  | +                  | +      | -   | -  | +   | - |
| <i>S. pyogenes</i><br>(GAS)       | NZ131       | THB+0.2Y            | +                         | +     | +     | +  | +  | +  | +                  | +      | -   | -  | -   | - |
|                                   |             | DM                  | +                         | +     | +     | +  | +  | +  | +                  | +      | -   | -  | -   | - |
|                                   |             | DM-HS               | +                         | +     | +     | +  | +  | +  | +                  | +      | -   | -  | +   | - |
|                                   | MGAS<br>315 | THB+0.2Y            | +                         | +     | +     | +  | +  | +  | +                  | +      | -   | -  | -   | - |
|                                   |             | DM                  | +                         | +     | +     | +  | +  | +  | +                  | +      | -   | -  | -   | - |
|                                   |             | DM-HS               | +                         | +     | +     | +  | +  | +  | +                  | +      | -   | -  | +   | - |
| <i>S. agalactiae</i><br>(GBS)     | COH1        | THB                 | +                         | +     | +     | +  | +  | +  | +                  | +      | +   | +  | -   | - |
|                                   |             | DM                  | +                         | +     | +     | +  | +  | +  | +                  | +      | +   | +  | -   | - |
|                                   |             | DM-HS               | +                         | +     | +     | +  | +  | +  | +                  | +      | +   | +  | -   | + |
|                                   | A909        | THB                 | +                         | +     | +     | +  | +  | +  | +                  | +      | +   | +  | -   | - |
|                                   |             | DM                  | +                         | +     | +     | +  | +  | +  | +                  | +      | +   | +  | -   | - |
|                                   |             | DM-HS               | +                         | +     | +     | +  | +  | +  | +                  | +      | +   | +  | -   | + |

433 <sup>1</sup>Todd-Hewitt Broth (THB); THB supplemented with 0.5% yeast extract (THB+0.5Y);  
 434 THB supplemented with 0.2% yeast extract (THB+0.2Y); Streptococcal defined medium  
 435 (DM), Streptococcal defined medium supplemented with 5% v/v human serum (DM-  
 436 HS).

437 <sup>2</sup>Abbreviations and denotations: + , detected; -, undetected; DAG, diacylglycerol;  
 438 MHDAG, monohexosyldiacylglycerol; DHDAG, dihexosyldiacylglycerol; PA,  
 439 phosphatidic acid; PG, phosphatidylglycerol; CL, cardiolipin; C<sub>55</sub>-P, undecaprenyl  
 440 phosphate; Lys-PG, lysyl-phosphatidylglycerol; LGD, lysyl-glucosyl-DAG; PC,  
 441 phosphatidylcholine; pPC, plasmanyl-PC.

442 <sup>3</sup>*S. pneumoniae* lipid profiles in THB+0.5Y and defined medium were originally  
 443 described in Joyce LR *et al* 2019 (25).

444

1 **Supplemental Text, Figures, and Table**

2

3 ***Streptococcus pneumoniae*, *S. pyogenes*, and *S. agalactiae* membrane**

4 **phospholipid remodeling in response to human serum**

5

6 Luke. R. Joyce<sup>1</sup>, Ziqiang Guan<sup>2#</sup>, and Kelli L. Palmer<sup>1#</sup>

7

8 <sup>1</sup>Department of Biological Sciences, The University of Texas at Dallas, Richardson, TX,

9 USA

10 <sup>2</sup>Department of Biochemistry, Duke University Medical Center, Durham, NC, USA

11

12

13 **Running title: Phospholipid remodeling in pathogenic streptococci**

14

15 #Corresponding authors

16 Ziqiang Guan: Ziqiang.Guan@duke.edu

17 Kelli Palmer: Kelli.Palmer@utdallas.edu

18

## 19 **Supplemental Text S1. Materials and Methods**

### 20 **Growth curves**

21 GAS and GBS were cultured overnight in defined medium and diluted to a starting  
22 OD<sub>600nm</sub> of 0.05 in 15 mL pre-warmed defined medium supplemented with or without 5%  
23 v/v human serum. The OD<sub>600nm</sub> was monitored manually every hour using a Thermo  
24 Scientific Genesys 30 spectrophotometer. For *S. pneumoniae*, early exponential phase  
25 defined medium overnight cultures, as described above, were diluted 1:50 into pre-  
26 warmed defined medium supplemented with or without 5% v/v human serum. *S.*  
27 *pneumoniae* cultures were incubated for 4 h before the OD<sub>600nm</sub> was monitored every  
28 hour. Growth curves were performed in biological triplicate. Repeated measures two-way  
29 ANOVA with Bonferroni's multiple comparisons test was performed in GraphPad Prism  
30 version 8 for Windows, GraphPad software, San Diego, California, USA,  
31 [www.graphpad.com](http://www.graphpad.com).

32

### 33 **Acidic Bligh-Dyer extractions.**

34 Centrifugation was performed using a Sorvall RC6+ centrifuge. Cultures were pelleted at  
35 4,280 x *g* for 5 min at room temperature. The supernatants were removed and stored at  
36 -80°C until acidic Bligh-Dyer lipid extractions were performed as described (1,2). Briefly,  
37 cell pellets were resuspended in 1X PBS (Sigma-Aldrich) and transferred to Corning Pyrex  
38 glass tubes with PTFE-lined caps (VWR), followed by 1:2 vol:vol chloroform:methanol  
39 addition. Single phase extractions were vortexed periodically and incubated at room  
40 temperature for 15 minutes before 500 x *g* centrifugation for 10 min. A two-phase Bligh-  
41 Dyer system was achieved by addition of 100 µl 37% HCL, 1 mL CHCl<sub>3</sub>, and 900 µl of 1X  
42 PBS, which was then vortexed and centrifuged for 5 min at 500 x *g*. The lower phase was



43 removed to a new tube and dried under nitrogen before being stored at -80°C prior to  
44 lipidomic analysis.

45

46 **Normal-Phase Liquid Chromatography-Electrospray Ionization/Mass Spectrometry**  
47 **(LC-ESI/MS).**

48 Normal-phase LC-ESI/MS was performed on an Agilent 1200 quaternary LC system  
49 equipped with an Ascentis silica high-performance liquid chromatography (HPLC) column  
50 (5 µm; 25 cm by 2.1 mm; Sigma-Aldrich) as described previously (1–3). Briefly, mobile  
51 phase A consisted of chloroform-methanol-aqueous ammonium hydroxide (800:195:5,  
52 vol/vol), mobile phase B consisted of chloroform-methanol-water-aqueous ammonium  
53 hydroxide (600: 340:50:5, vol/vol), and mobile phase C consisted of chloroform-methanol-  
54 water-aqueous ammonium hydroxide (450:450:95:5, vol/vol/vol/vol). The elution program  
55 consisted of the following: 100% mobile phase A was held isocratically for 2 min, then  
56 linearly increased to 100% mobile phase B over 14 min, and held at 100% mobile phase  
57 B for 11 min. The LC gradient was then changed to 100% mobile phase C over 3 min,  
58 held at 100% mobile phase C for 3 min, and, finally, returned to 100% mobile phase A  
59 over 0.5 min and held at 100% mobile phase A for 5 min. The LC eluent (with a total flow  
60 rate of 300 ml/min) was introduced into the ESI source of a high-resolution TripleTOF5600  
61 mass spectrometer (Sciex, Framingham, MA). Instrumental settings for positive-ion ESI  
62 and MS/MS analysis of lipid species were as follows: IS = 5,000 V, CUR = 20 psi, GSI =  
63 20 psi, DP = +55 V, and FP = +150V. The MS/MS analysis used nitrogen as the collision  
64 gas. Data analysis was performed using Analyst TF1.5 software (Sciex, Framingham,  
65 MA).

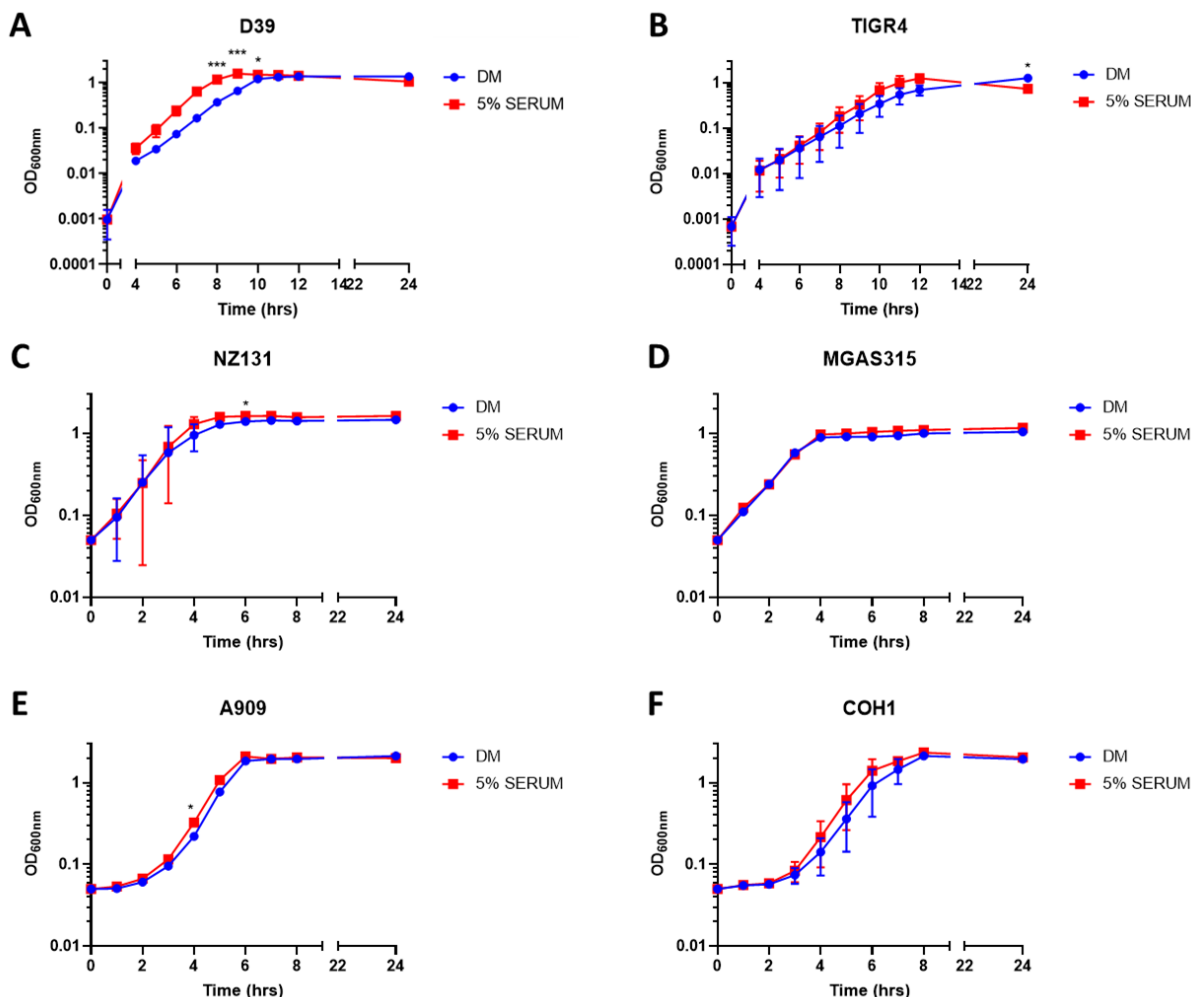

66

67 **Supplemental Figure S1. Growth characteristics of streptococci in the presence of**  
68 **5% human serum.** Growth curves in defined medium (DM) are shown in blue and defined  
69 medium supplemented 5% v/v human serum are shown in red. A) *S. pneumoniae* D39,  
70 B) *S. pneumoniae* TIGR4, C) *S. pyogenes* NZ131, D) *S. pyogenes* MGAS315, E) *S.*  
71 *agalactiae* A909, and F) *S. agalactiae* COH1. Manual OD<sub>600nm</sub> readings were performed  
72 every hour. *S. pneumoniae* cultures were grown for 4 h before manual readings were  
73 performed. Growth curves were performed in biological triplicate. Mean and SD are  
74 indicated. Statistical analysis: A-F) repeated measures two-way ANOVA with Bonferroni's  
75 multiple comparisons test. \* denotes p-value < 0.05. \*\*\* denotes p-value < 0.001.

76

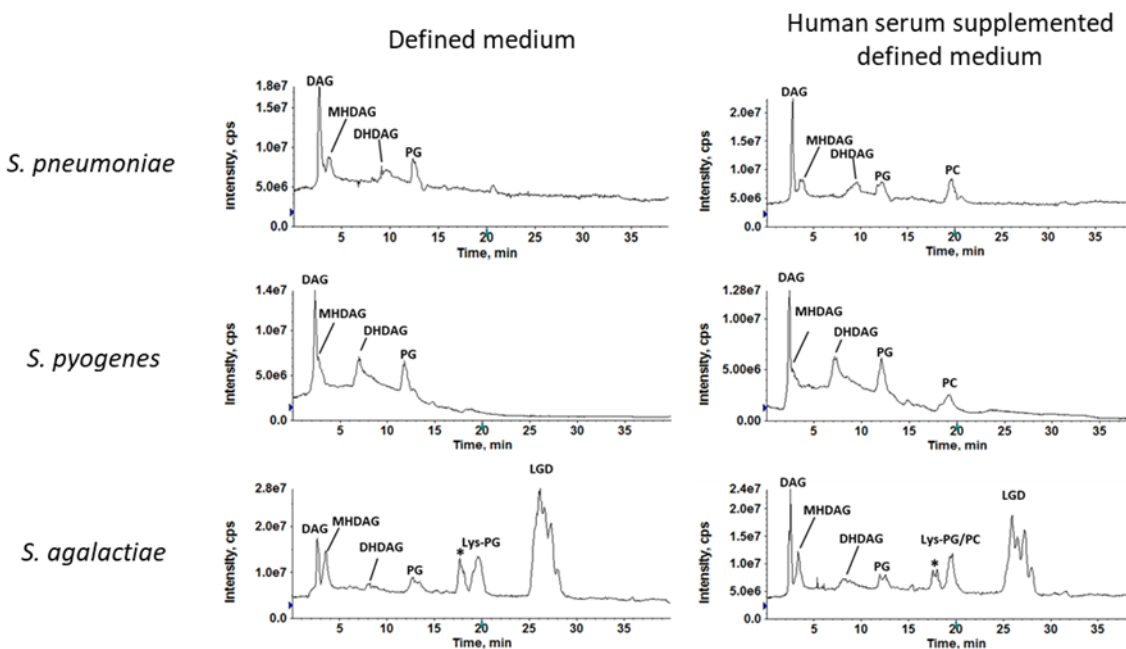

77

78 **Supplemental Figure S2. Positive ion mode total ion chromatograms (TIC) of**  
79 **streptococci grown in defined medium supplemented with or without 5% v/v human**  
80 **serum.** Representative positive ion mode TIC for *S. pneumoniae* (top panels), *S.*  
81 *pyogenes* (middle panels), and *S.agalactiae* (bottom panels), indicate relative abundance  
82 of lipids present in the cell extract when streptococci are cultured in defined medium or  
83 defined medium supplemented with 5% v/v human serum. Cultures were performed in  
84 biological triplicate. Abbreviations: DAG, diacylglycerol; MHDAG,  
85 monohexosyldiacylglycerol; DHDAG, dihexosyldiacylglycerol; PG, phosphatidylglycerol;  
86 Lys-PG, lysyl-phosphatidylglycerol; LGD, lysyl-glucosyl-DAG; PC, phosphatidylcholine;  
87 '\*' Denotes methylcarbamate, an extraction artifact of LGD.

88

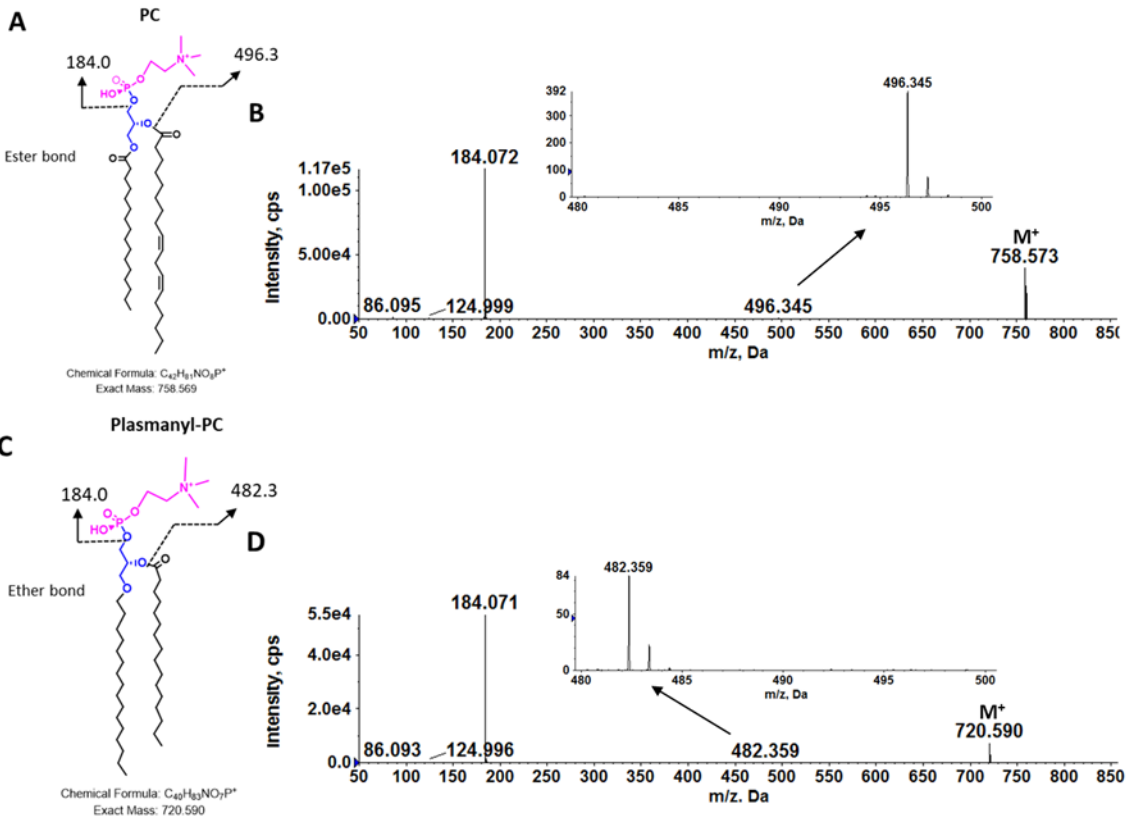

89

90 **Supplemental Figure S3. Confirmation of major PC and plasmayl-PC species by**  
91 **MS/MS fragmentation.** A) Chemical structure and fragmentation scheme of  
92 PC(16:0/18:2), B) MS/MS of  $m/z$  758 for PC(16:0/18:2), C) Chemical structure and  
93 fragmentation scheme of pPC(16:0/16:0), and D) MS/MS of  $m/z$  720 for pPC(16:0/16:0).  
94 MS/MS fragmentation, specifically  $m/z$  482 fragment, is consistent with the structure of  
95 pPC present in the GBS.

96

97

98

99 **Table S1. Strains used in this study.**

| Organism                   | Strain                 | Description                                                                                                                 | Ref   |
|----------------------------|------------------------|-----------------------------------------------------------------------------------------------------------------------------|-------|
| <i>S. pneumoniae</i>       | D39                    | Wild-type <i>S. pneumoniae</i> strain, capsule serotype 2. Obtained from Michael Federle, University of Illinois at Chicago | (4)   |
|                            | ATCC BAA-334 (TIGR4)   | Wild-type <i>S. pneumoniae</i> strain, capsule serotype 4                                                                   | (5)   |
| <i>S. pyogenes</i> (GAS)   | ATCC BAA-595 (MGAS315) | Wild-type <i>S. pyogenes</i> strain, M3 serotype                                                                            | (6)   |
|                            | ATCC BAA-1633 (NZ131)  | Wild-type <i>S. pyogenes</i> strain, M49 serotype                                                                           | (7,8) |
| <i>S. agalactiae</i> (GBS) | ATCC BAA-1176 (COH1)   | Wild-type <i>S. agalactiae</i> strain, serotype III                                                                         | (9)   |
|                            | ATCC BAA-1138 (A909)   | Wild-type <i>S. agalactiae</i> strain, serotype Ia                                                                          | (10)  |

100

101

102

103 **References**

- 104 1. Joyce LR, Guan Z, Palmer KL. Phosphatidylcholine Biosynthesis in Mitis Group  
105 Streptococci via Host Metabolite Scavenging. *J Bacteriol.* 2019;201(22):e00495-  
106 19. doi: 10.1128/JB.00495-19
- 107 2. Tan BK, Bogdanov M, Zhao J, Dowhan W, Raetz CRH, Guan Z. Discovery of a  
108 cardiolipin synthase utilizing phosphatidylethanolamine and phosphatidylglycerol  
109 as substrates. *Proc Natl Acad Sci.* 2012;109(41):16504–9. doi:  
110 10.1073/pnas.1212797109
- 111 3. Li C, Tan BK, Zhao J, Guan Z. In vivo and in vitro synthesis of  
112 phosphatidylglycerol by an *Escherichia coli* cardiolipin synthase. *J Biol Chem.*  
113 2016;291(48):25144–53. doi: 10.1074/jbc.M116.762070
- 114 4. Lanie JA, Ng WL, Kazmierczak KM, Andrzejewski TM, Davidsen TM, Wayne KJ,  
115 et al. Genome sequence of Avery’s virulent serotype 2 strain D39 of  
116 *Streptococcus pneumoniae* and comparison with that of unencapsulated  
117 laboratory strain R6. *J Bacteriol.* 2007;189(1):38–51. doi: 10.1128/JB.01148-06
- 118 5. Tettelin H, Nelson KE, Paulsen IT, Eisen JA, Read TD, Peterson S, et al.  
119 Complete genome sequence of a virulent isolate of *Streptococcus pneumoniae*.  
120 *Science.* 2001;293(5529):498–506. doi: 10.1126/science.1061217
- 121 6. Musser JM, Hauser AR, Kim MH, Schlievert PM, Nelson K, Selander RK.  
122 *Streptococcus pyogenes* causing toxic-shock-like syndrome and other invasive  
123 diseases: clonal diversity and pyrogenic exotoxin expression. *Proc Natl Acad Sci*

- 124 U S A. 1991;88(7):2668–72. doi: 10.1073/pnas.88.7.2668
- 125 7. Simon D, Ferretti JJ. Electrotransformation of *Streptococcus pyogenes* with  
126 plasmid and linear DNA. *FEMS Microbiol Lett.* 1991;66(2):219–24. doi:  
127 10.1016/0378-1097(91)90336-9
- 128 8. McShan WM, Ferretti JJ, Karasawa T, Suvorov AN, Lin S, Qin B, et al. Genome  
129 sequence of a nephritogenic and highly transformable M49 strain of  
130 *Streptococcus pyogenes*. *J Bacteriol.* 2008;190(23):7773–85. doi:  
131 10.1128/JB.00672-08
- 132 9. Kuypers JM, Heggen LM, Rubens CE. Molecular analysis of a region of the Group  
133 B *Streptococcus* chromosome involved in type III capsule expression. *Infect*  
134 *Immun.* 1989;57(10):3058–65. doi: 10.1128/IAI.57.10.3058-3065.1989
- 135 10. Lancefield RC, McCarty M, Everly WN. Multiple mouse-protective antibodies  
136 directed against Group B Streptococci. Special reference to antibodies effective  
137 against protein antigens. *J Exp Med.* 1975;142(1):165–79. doi:  
138 10.1084/jem.142.1.165
- 139
